# Supplementary material for: Harvesting thermal energy via tube-based triboelectric nanogenerators within an oscillating heat pipe
Source: Royal Society of Chemistry journal article supplement (doi:10.1039/d1se01661j), 2021-12-15
Supplement: d1se01661j1.pdf [file d1se01661j1.pdf]

## **Electronic Supplementary Information**

### Harvesting Thermal Energy via Tube-based Triboelectric Nanogenerators within an Oscillating Heat Pipe

Chao Chang,\* Xiaoyu He, Zhaoyang Han, Lilin Pei, Zongyu Wang and Yulong Ji\*

Institute of Marine Engineering and Thermal Science, Marine Engineering College,  
Dalian Maritime University, Dalian 116026, P. R. China

E-mails: [chaochang@dlmu.edu.cn](mailto:chaochang@dlmu.edu.cn); [jiyulong@dlmu.edu.cn](mailto:jiyulong@dlmu.edu.cn)

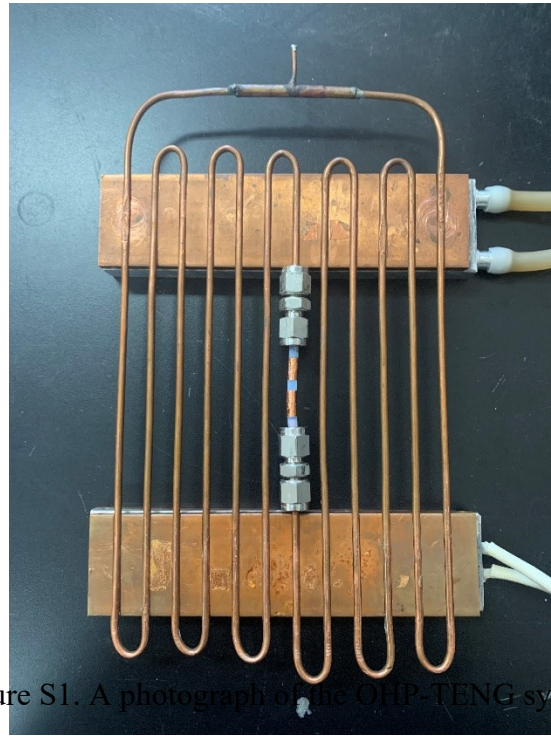

Figure S1. A photograph of the OHP-TENG system.

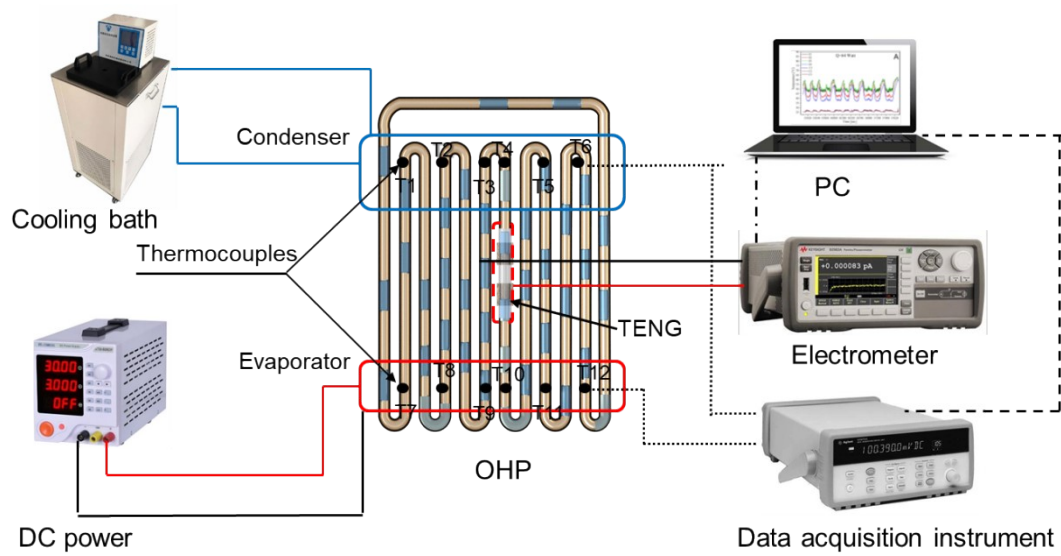

Figure S2. Experimental setup for measuring the performance of the TENG-OHP.

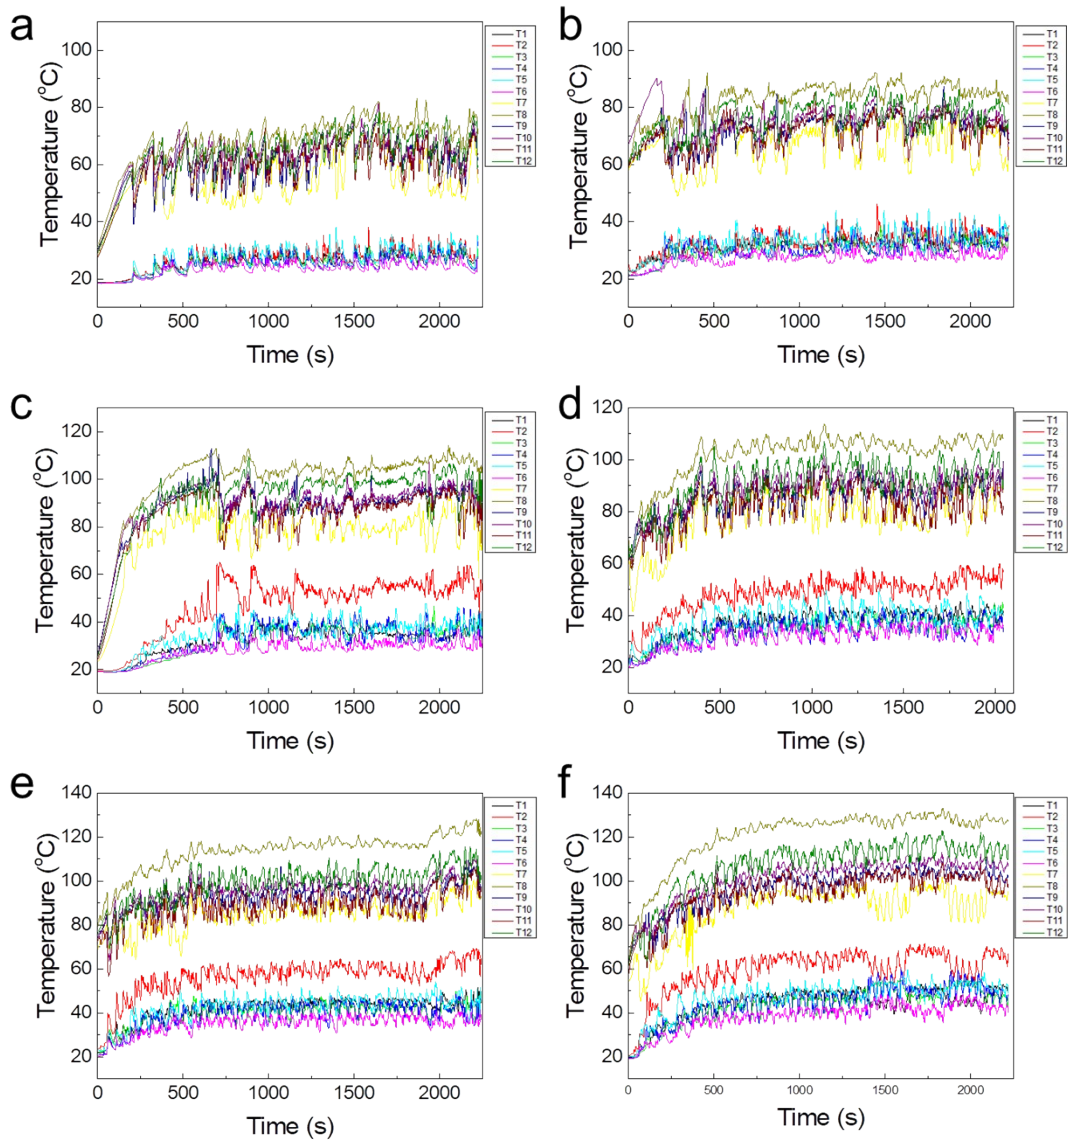

Figure S3. Temperature evolution of the OHP-TENG system at the heating power of (a) 40W, (b) 60W, (c) 80W, (d) 100W(e) 120W and (f) 140W.

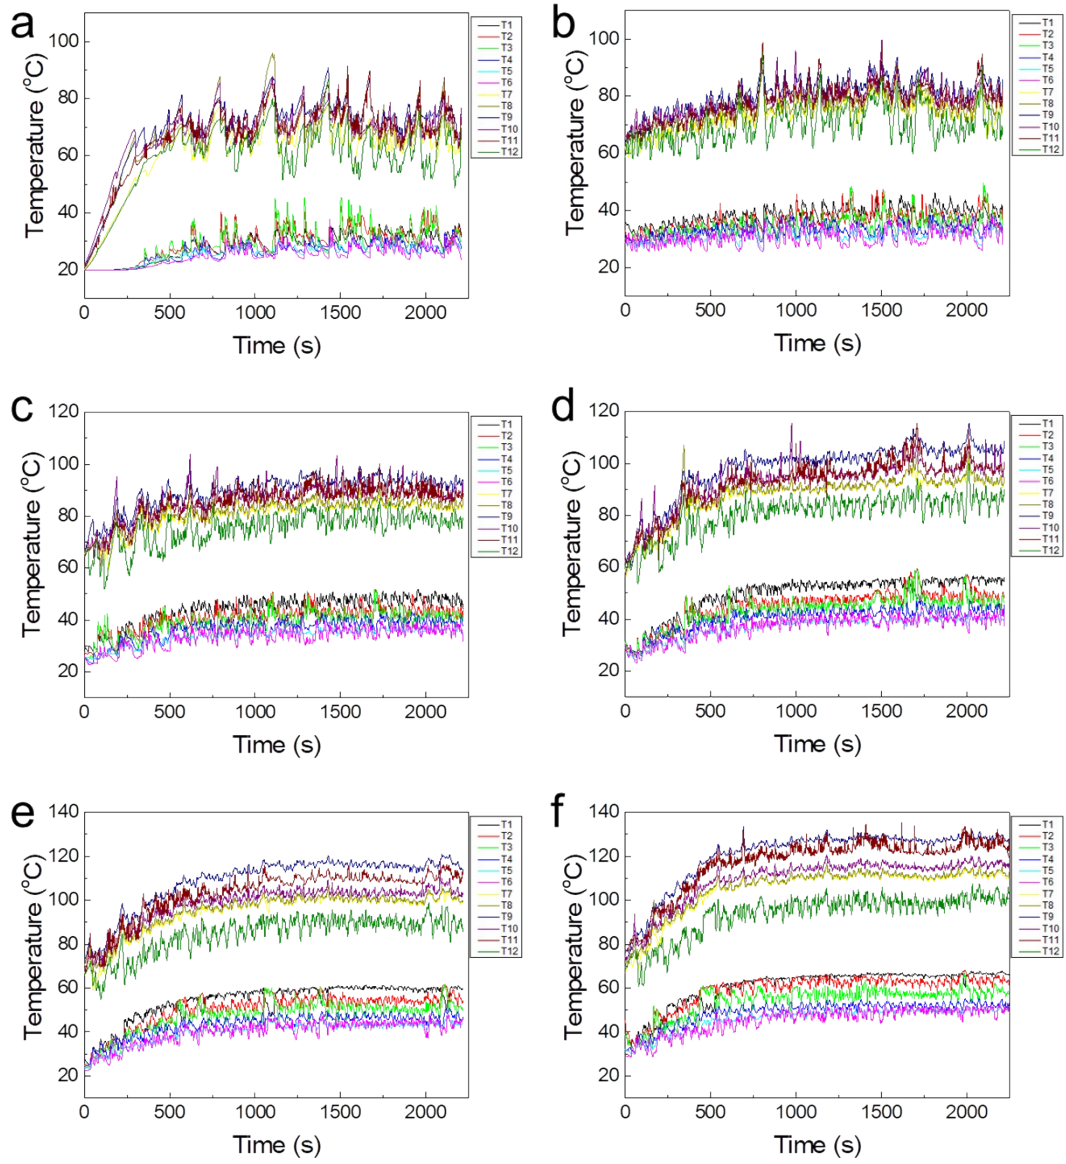

Figure S4. Temperature evolution of the OHP at the heating power of (a) 40W, (b) 60W, (c) 80W, (d) 100W, (e) 120W and (f) 140W.

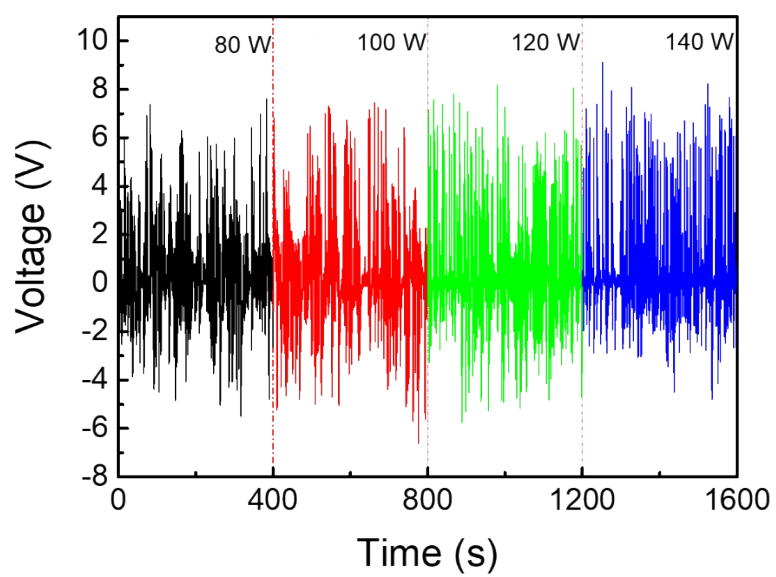

Figure S5. Output voltages of the TENG-OHP under different heating powers from 80 W to 140 W.
